# Supplementary material for: Near infrared organic light emitting devices based on a new erbium(iii) β-diketonate complex: synthesis and optoelectronic investigations
Source: Royal Society of Chemistry journal article supplement (doi:10.1039/c6ra27473k), 2017-01-01
Supplement: c6ra27473k1.pdf [file c6ra27473k1.pdf]

## Supplementary information

### Near Infra-red Organic Light Emitting Devices based on a new Erbium (III) $\beta$ -diketonate Complex: Synthesis and Optoelectronic Investigations

Zubair Ahmed\*<sup>1</sup>, Rian E. Aderne<sup>1</sup>, Jiang Kai<sup>2</sup>, J.A.L.C. Resende<sup>3</sup>, Helmut I. Padilla-Chavarría<sup>2</sup>, Marco Cremona\*<sup>1</sup>

<sup>1</sup>Department of Physics, Pontifícia Universidade Católica do Rio de Janeiro, PUC-Rio, Rio de Janeiro, RJ 22453-970, Brazil.

<sup>2</sup>Department of Chemistry, Pontifícia Universidade Católica do Rio de Janeiro, PUC-Rio, Rio de Janeiro, RJ 22453-970, Brazil.

<sup>3</sup>Instituto de Ciências Exatas e da Terra, Centro Universitário do Araguaia, Universidade Federal do Mato Grosso, 78600-000, Barra do Garças - MT, Brasil.

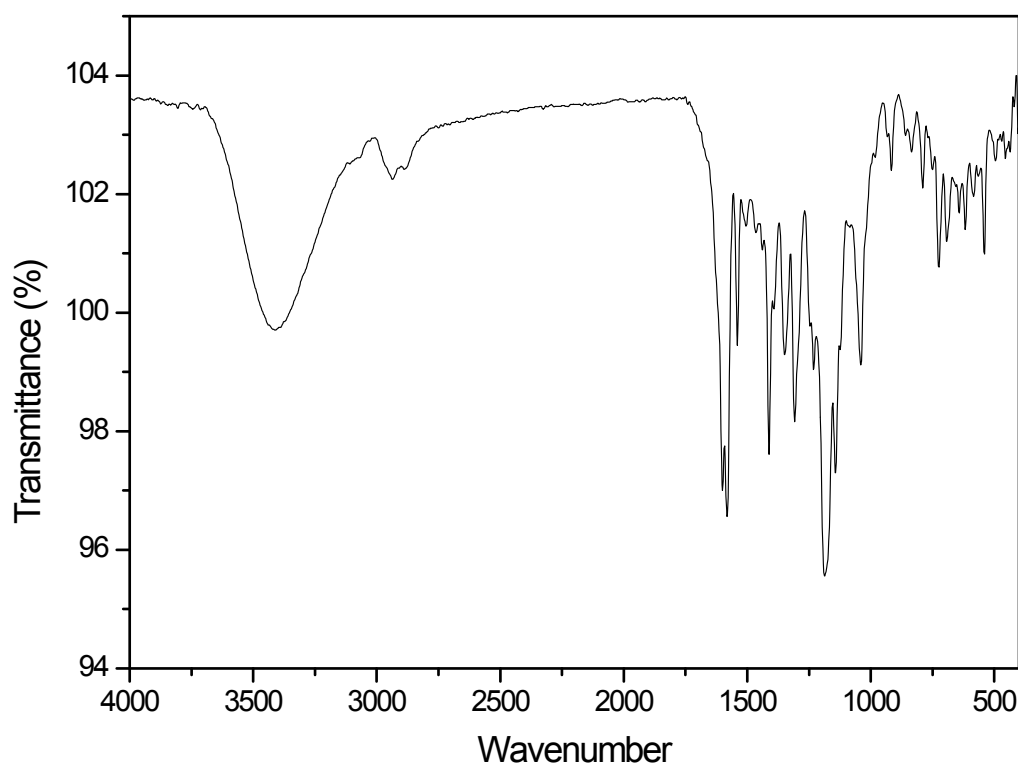

**Fig. S1.** FTIR spectrum of the [Er(tta)<sub>3</sub>tppo].

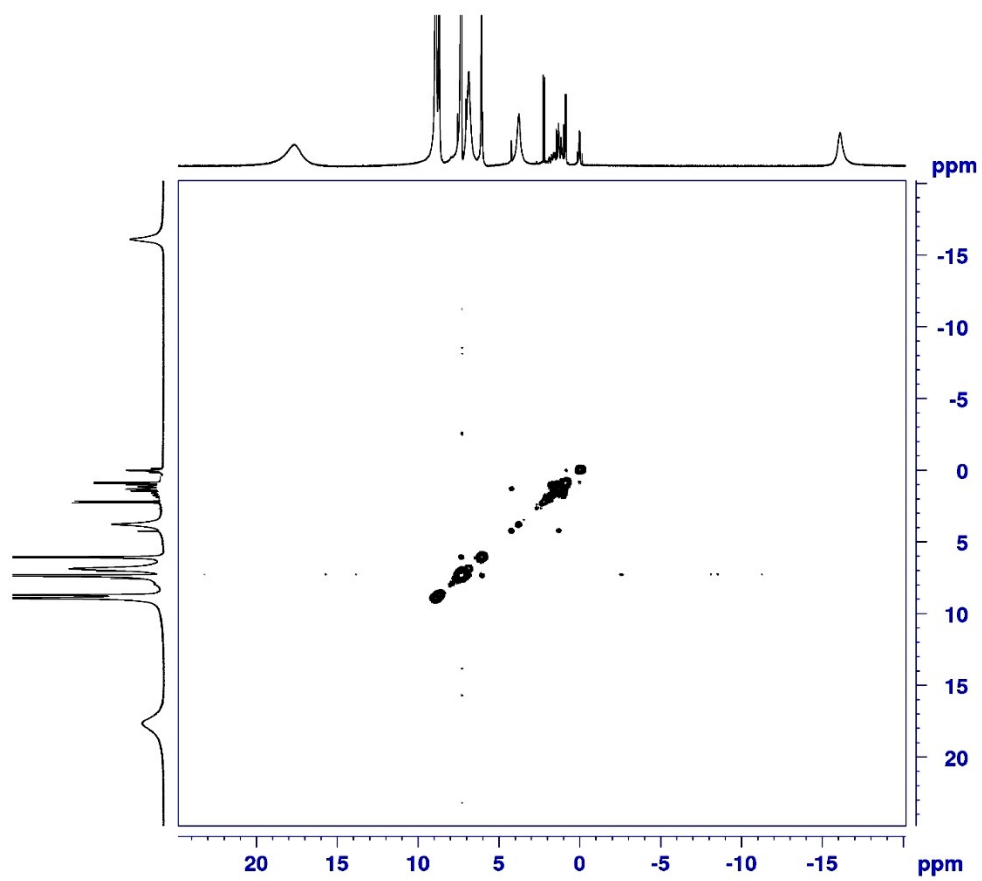

**Fig.S2.** <sup>1</sup>H- <sup>1</sup>H COSY spectrum of [Er(tta)<sub>3</sub>tppo].

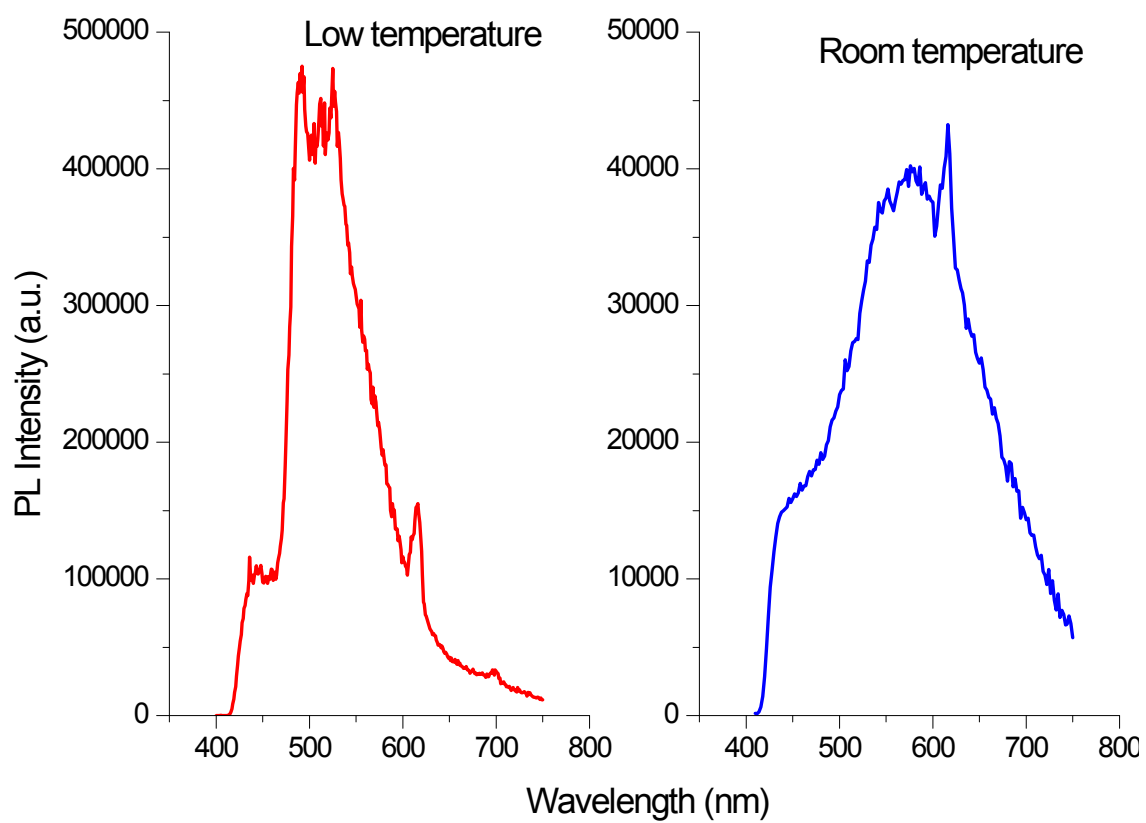

**Fig. S3.** Emission spectra of the  $[\text{Er}(\text{tta})_3\text{tppo}]$  in visible region at low and room temperatures.

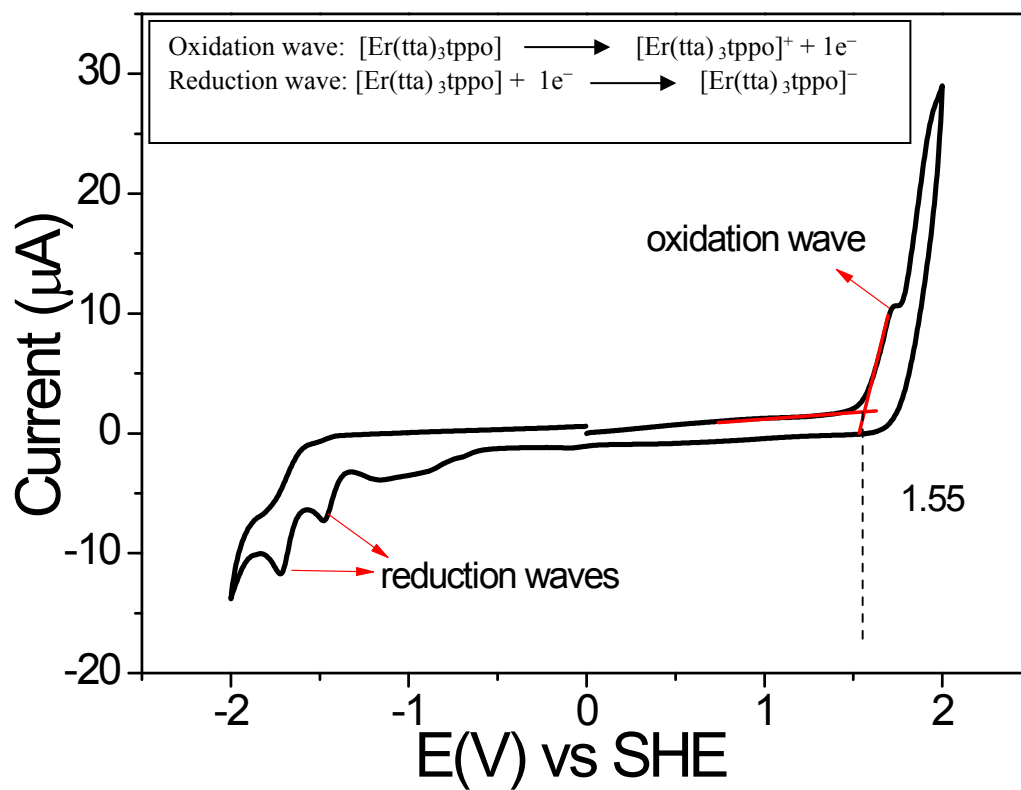

**Fig. S4.** Cyclic voltammety curve of  $[\text{Er}(\text{tta})_3\text{tppo}]$ .
